# Supplementary material for: Simultaneous hydrogenation and acid-catalyzed conversion of the biomass-derived furans in solvents with distinct polarities
Source: Royal Society of Chemistry journal article supplement (doi:10.1039/c5ra22414d), 2016-01-01
Supplement: c5ra22414d1.pdf [file c5ra22414d1.pdf]

## Electronic Supplementary Information

### **Simultaneous hydrogenation and acid-catalyzed conversion of the biomass-derived furans in the solvents with distinct polarities**

Xun Hu, Sri Kadarwati, Yao Song and Chun-Zhu Li\*

Fuels and Energy Technology Institute, Curtin University of Technology,  
GPO Box U1987, Perth, WA 6845, Australia

Number of pages: 19.

Number of Figures: 18.

---

\*Corresponding author. Tel: (+) 61 8 9266 1131; Fax: (+) 61 8 9266 1138; E-mail: [chun-zhu.li@curtin.edu.au](mailto:chun-zhu.li@curtin.edu.au)

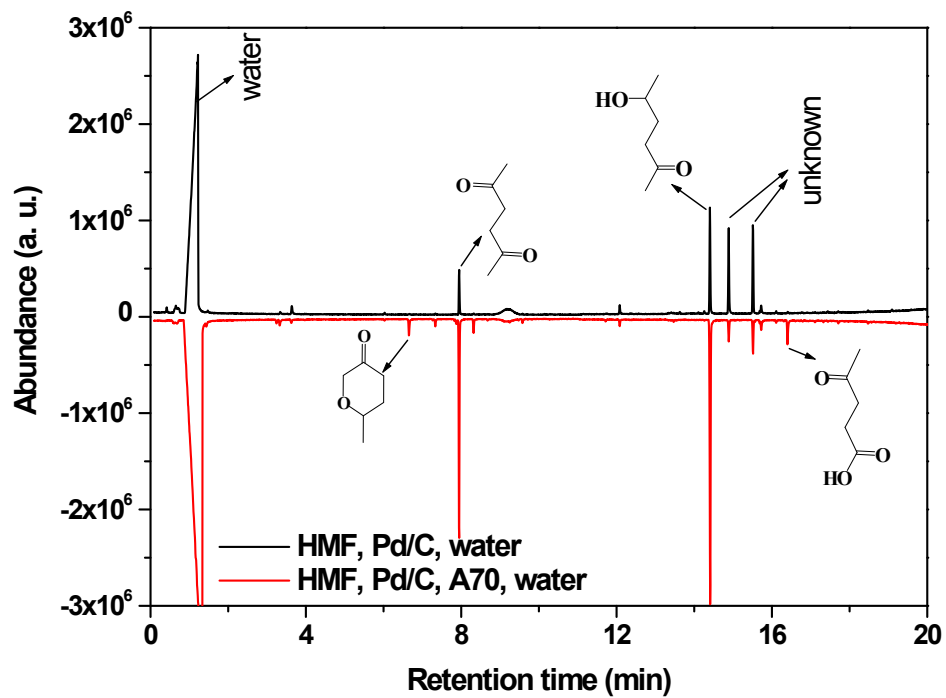

**Figure S1** GC-MS spectra for the products in hydrogenation of HMF in water in the absence and presence of A70 catalyst.

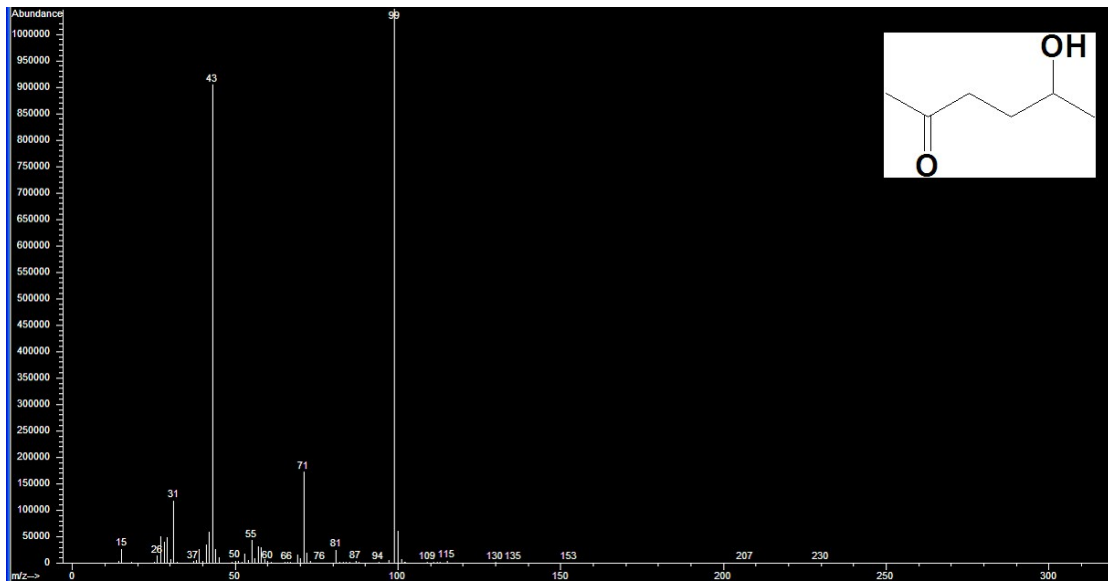

**Figure S2** MS spectrum for 5-hydroxy-2-hexanone.

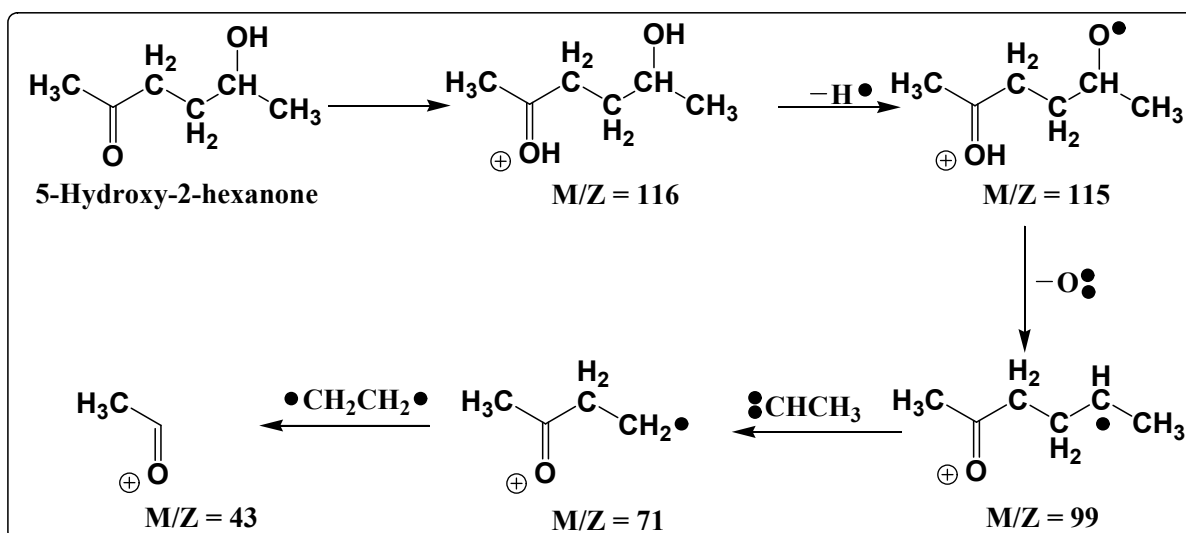

**Figure S3** Proposed reaction pathways for the degradation of 5-hydroxy-2-hexanone in the mass spectrometer.

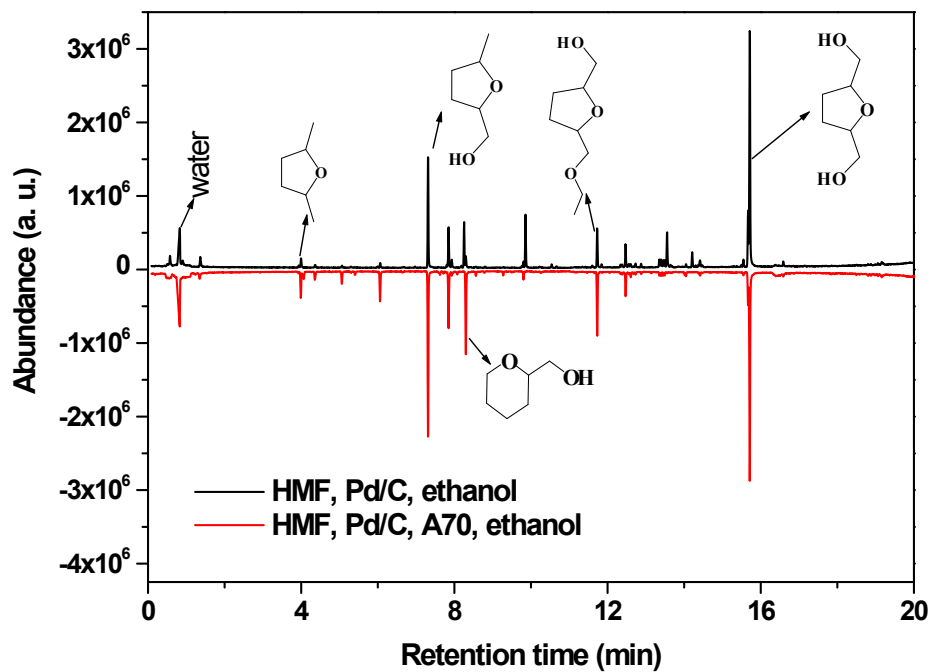

**Figure S4** GC-MS spectra for the products in hydrogenation of HMF in ethanol in the absence and presence of A70 catalyst.

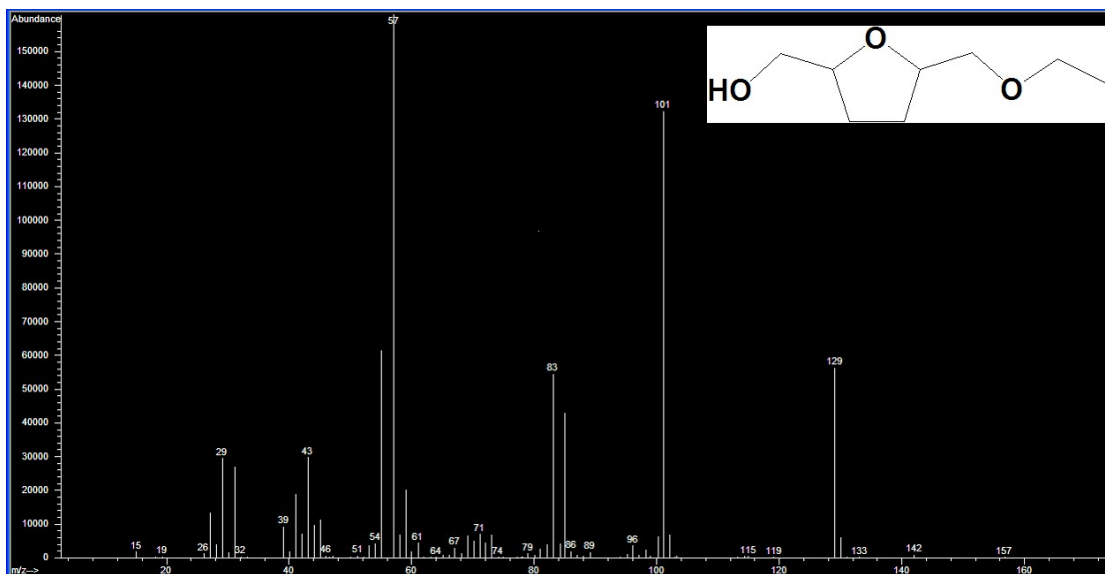

**Figure S5** MS spectrum for 5-ethoxymethyl-tetrahydrofurfuryl-methanol (ETHM).

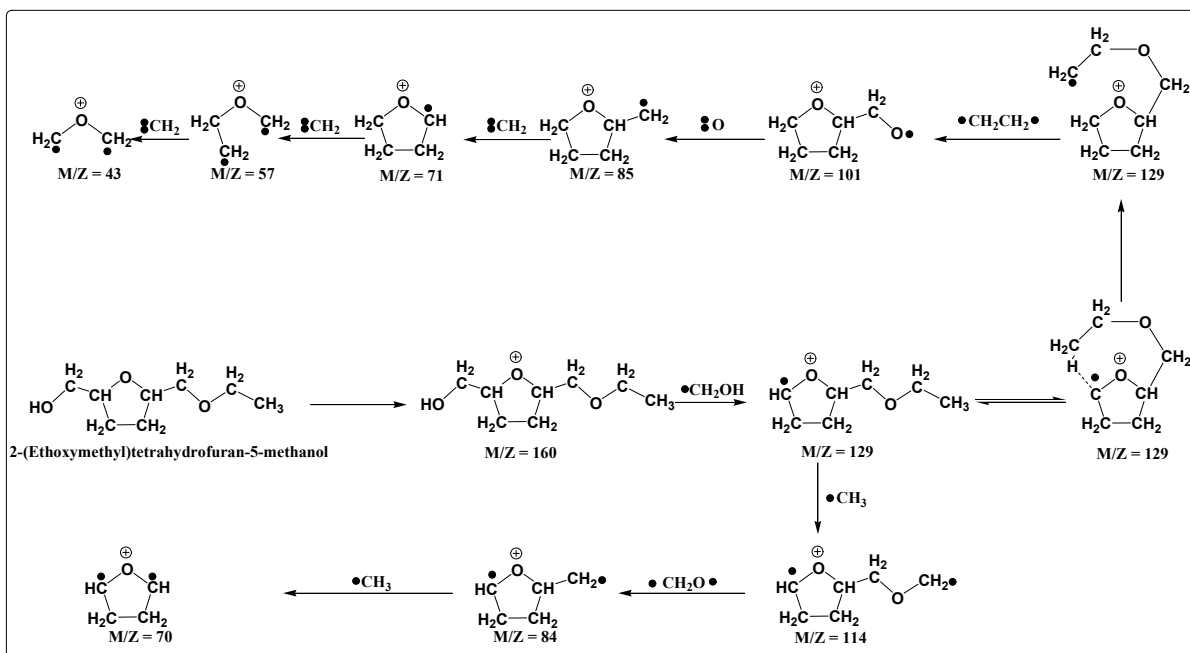

**Figure S6** Proposed reaction pathways for the degradation of 5-ethoxymethyl-tetrahydrofuryl-methanol in the mass spectrometer.

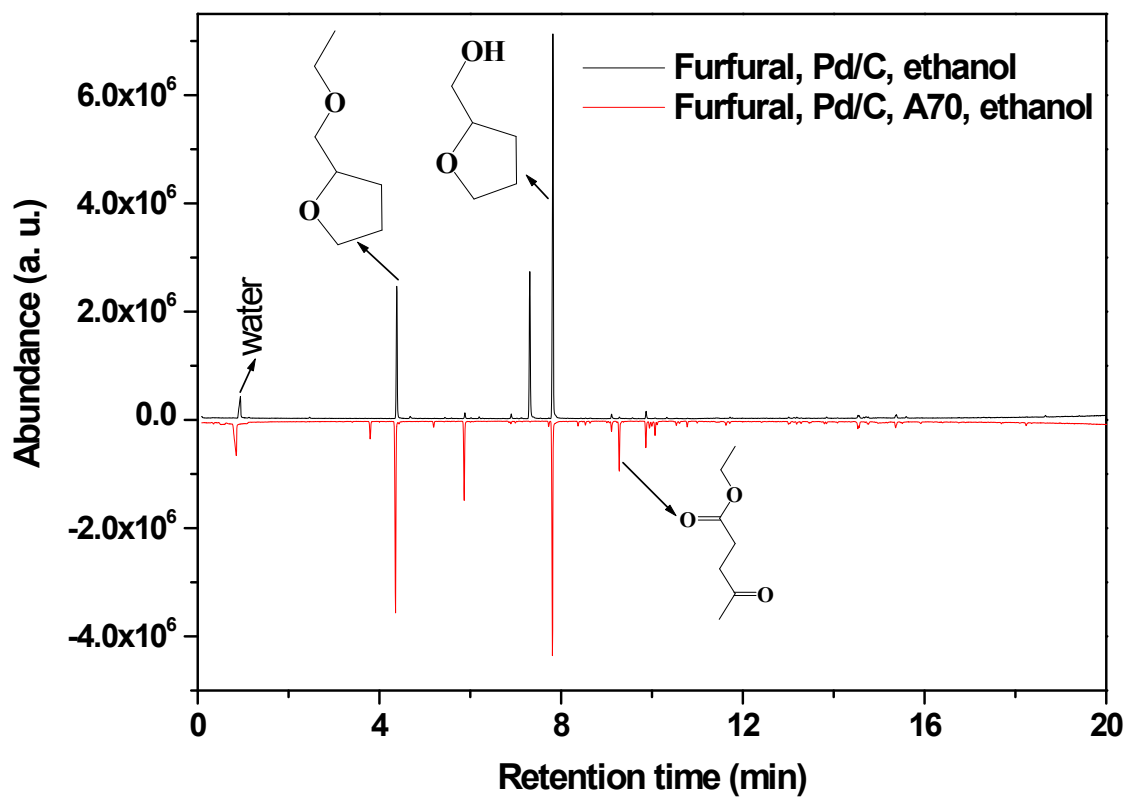

**Figure S7** GC-MS spectra for the products in hydrogenation of furfural in ethanol in the absence and presence of A70 catalyst.



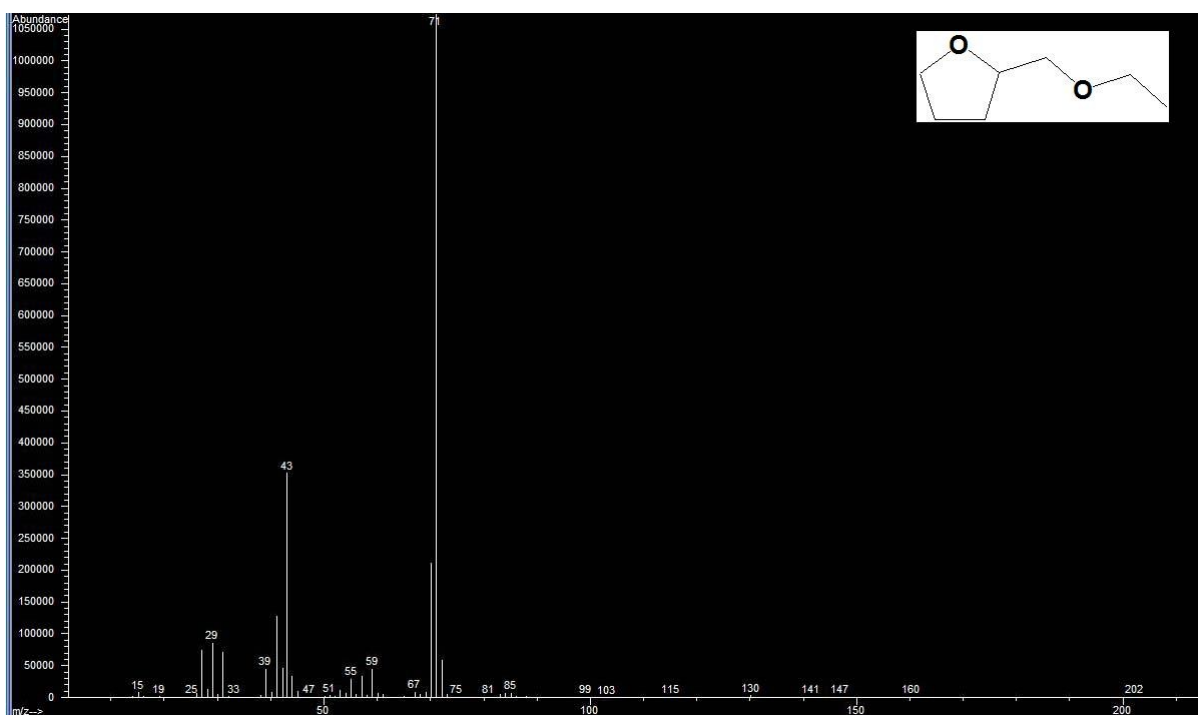

**Figure S8** MS spectrum for 2-ethoxymethyl-tetrahydrofuran (EMTF).

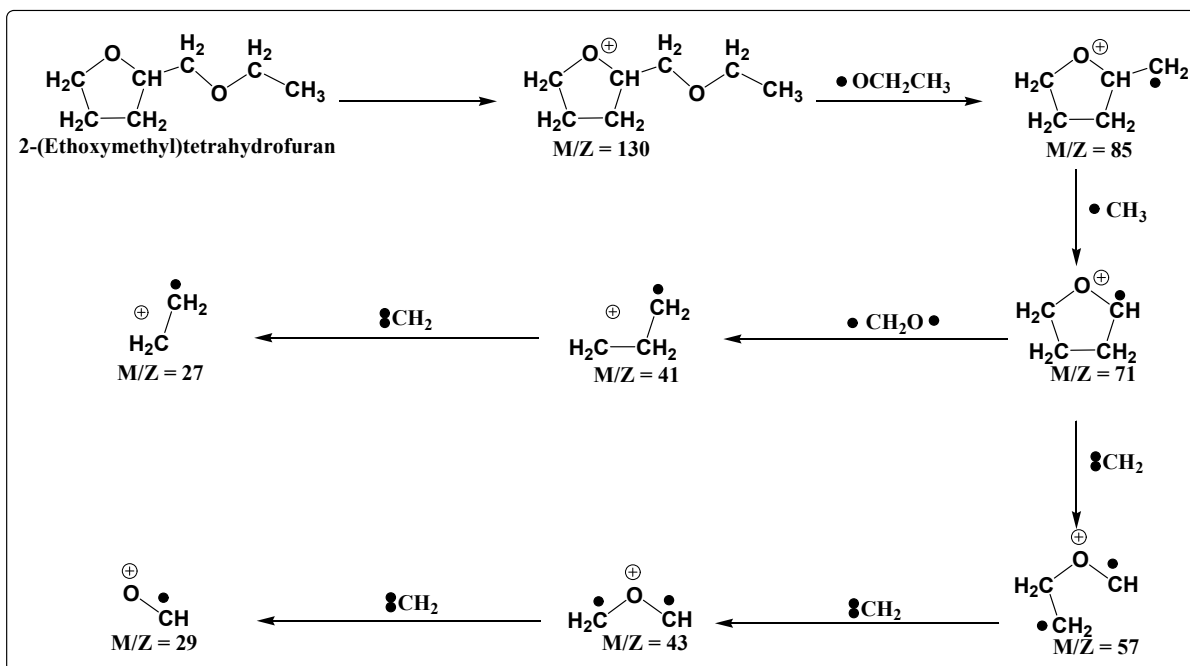

**Figure S9** Proposed reaction pathways for the degradation of 2-ethoxymethyl-tetrahydrofuran in the mass spectrometer.

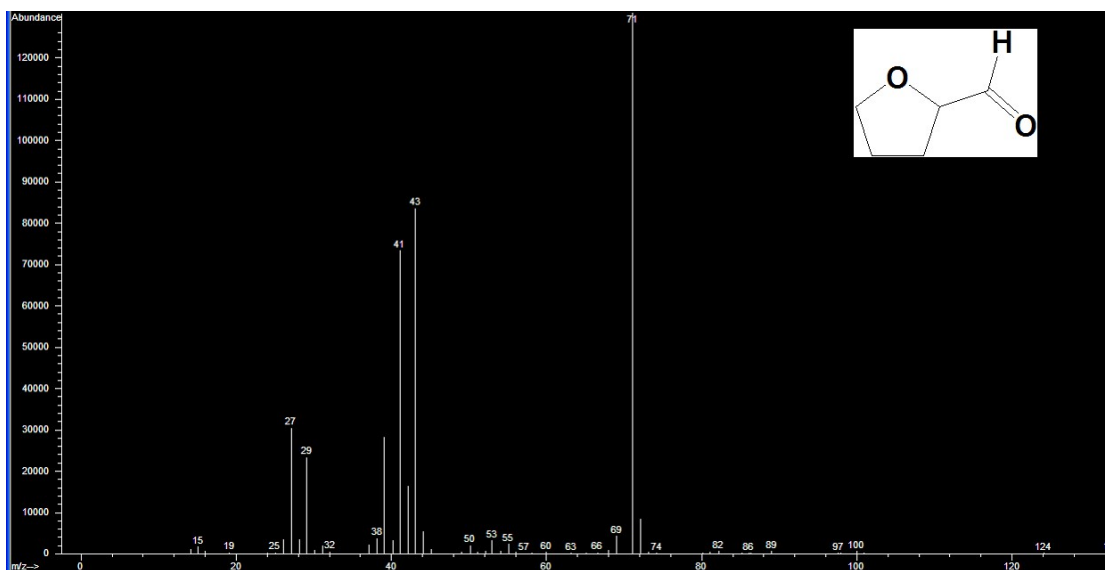

**Figure S10** MS spectrum for tetrahydrofuran-2-carbaldehyde (THFC).

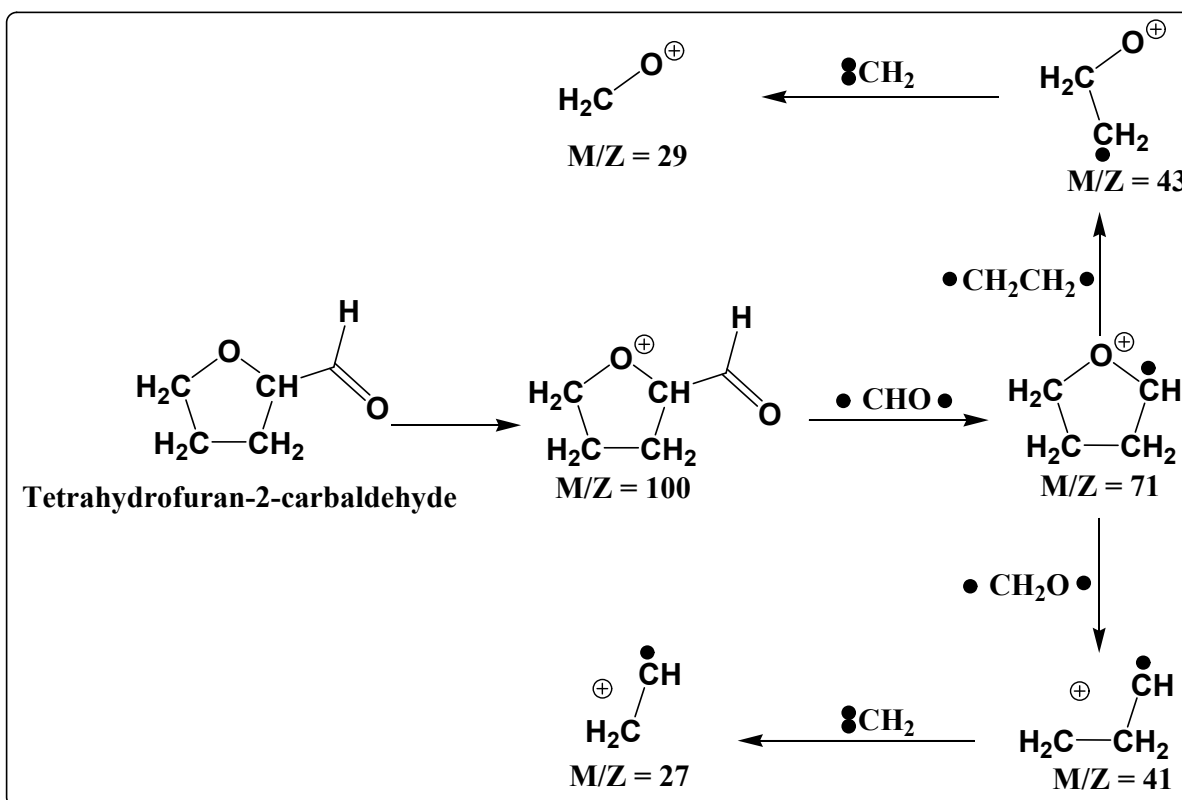

**Figure S11** Proposed reaction pathways for the degradation of tetrahydrofuran-2-carbaldehyde in the mass spectrometer.

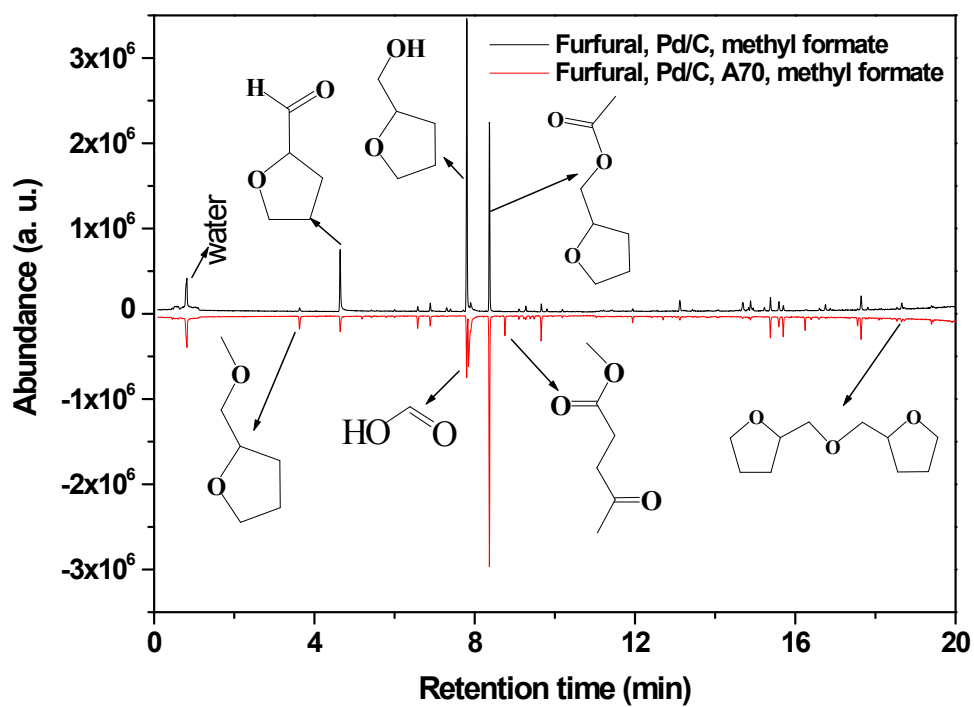

**Figure S12** GC-MS spectra for the products in hydrogenation of furfural in methyl formate in the absence and presence of A70 catalyst.

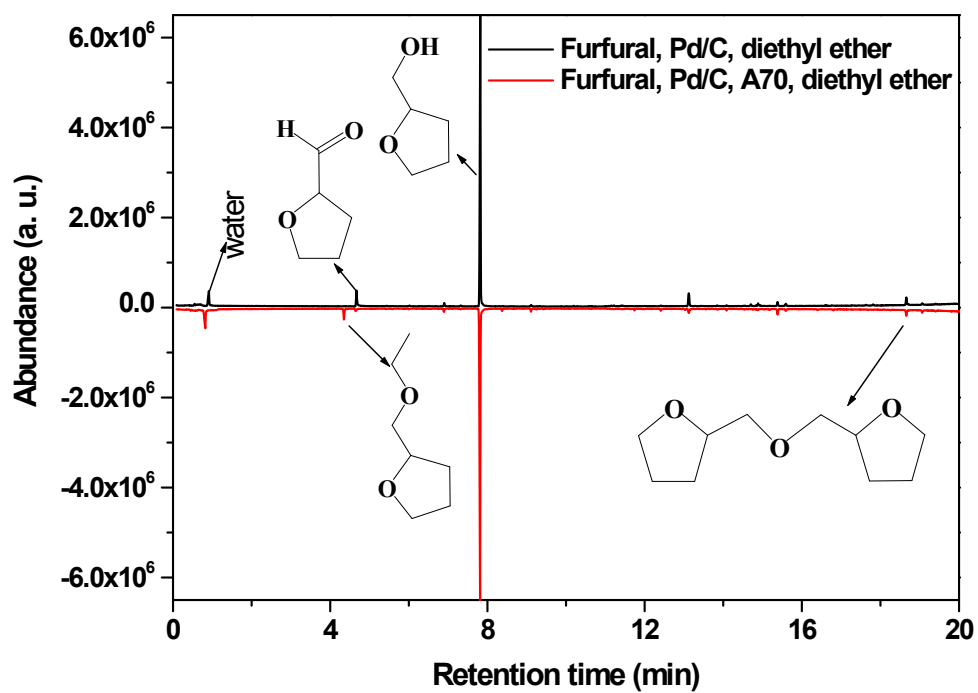

**Figure S13** GC-MS spectra for the products in hydrogenation of furfural in diethyl ether in the absence and presence of A70 catalyst.

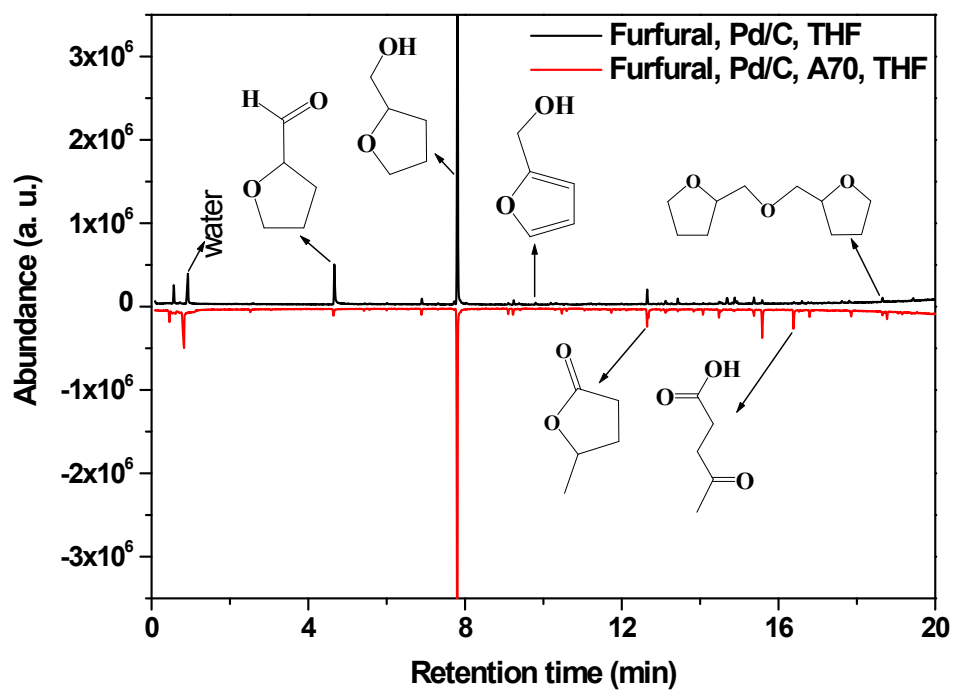

**Figure S14** GC-MS spectra for the products in hydrogenation of furfural in THF in the absence and presence of A70 catalyst.

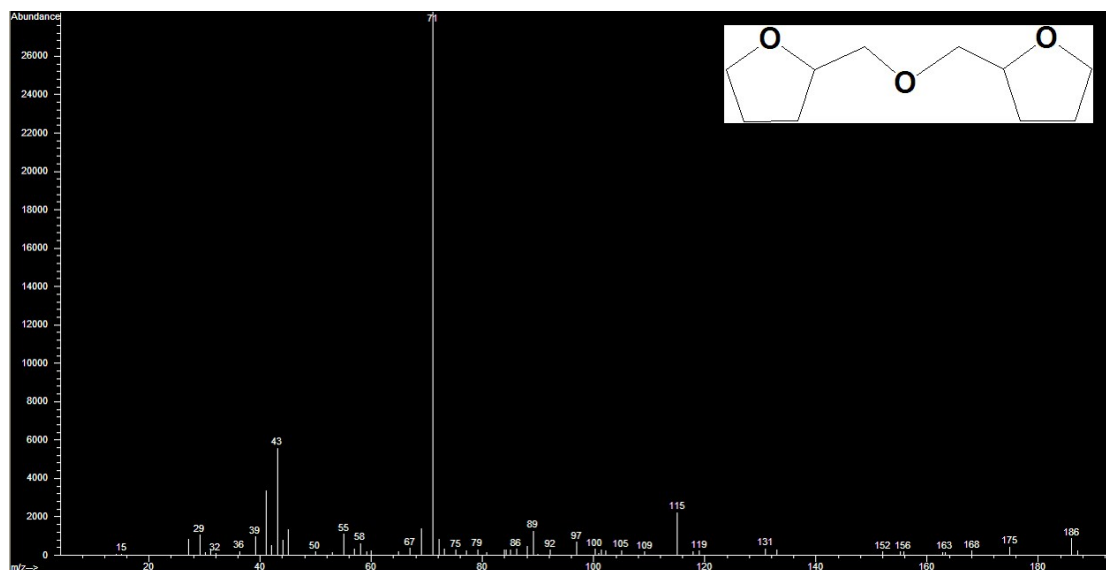

**Figure S15** MS spectrum for di-tetrahydrofuran methyl ether.



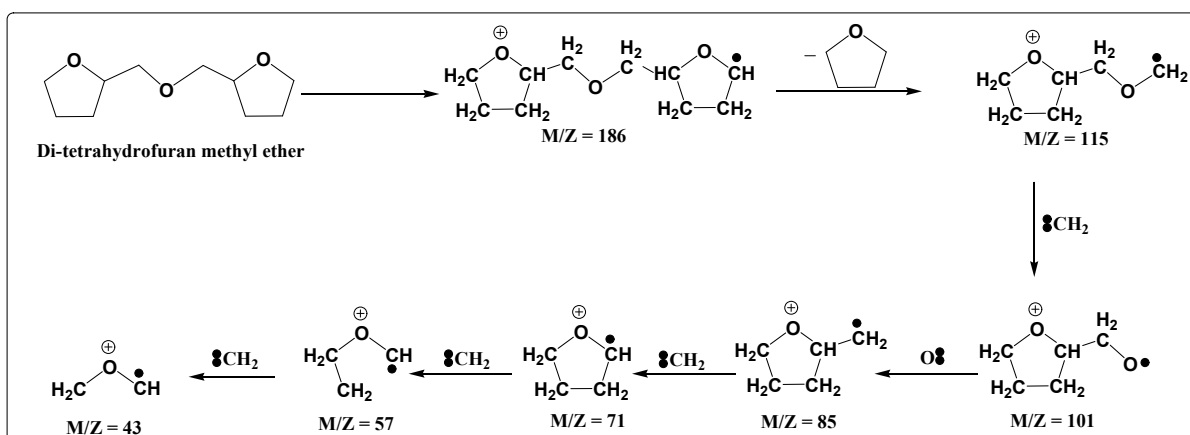

**Figure S16** Proposed reaction pathways for the degradation of di-tetrahydrofuran methyl ether in the mass spectrometer.

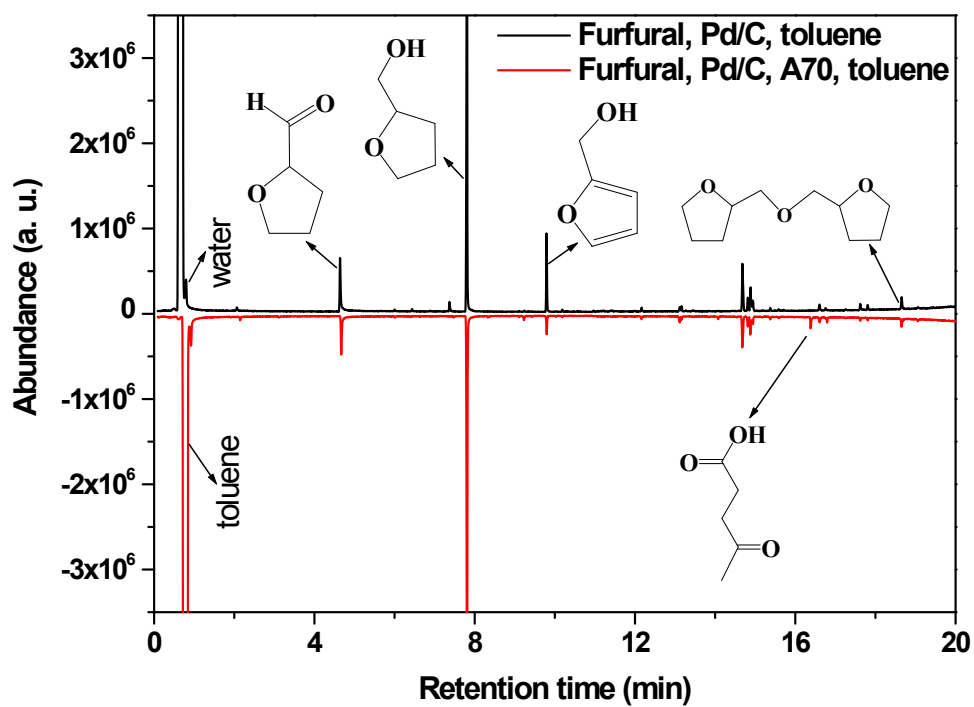

**Figure S17** GC-MS spectra for the products in hydrogenation of furfural in toluene in the absence and presence of A70 catalyst.

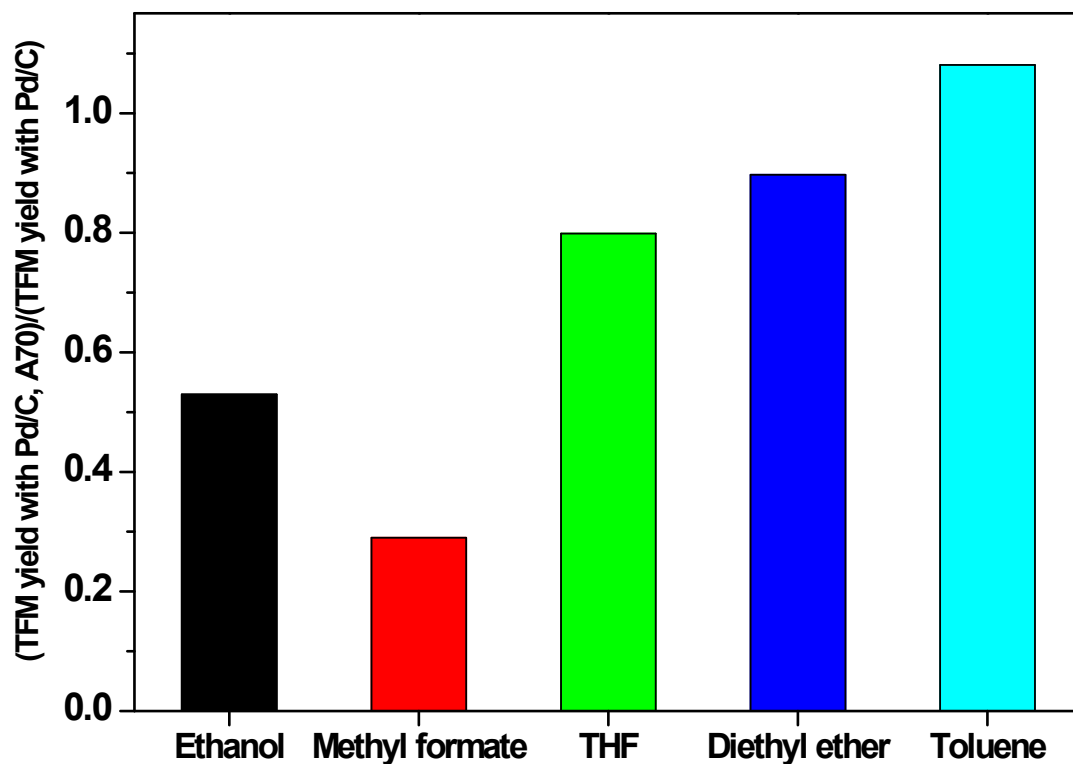

**Figure S18** Ratio of TFM yields in the presence of Pd/C and A70 to the TFM yields in the presence of Pd/C in the various solvents.
